# Supplementary material for: Modification of mixed-nitrogen anions configuration for accelerating lithium ions transport in the LiFePO4 electrode
Source: Royal Society of Chemistry journal article supplement (doi:10.1039/d3ra06242b), 2023-01-01
Supplement: d3ra06242b1.pdf [file d3ra06242b1.pdf]

*Supporting information*

Modification of mixed-nitrogen anions configuration for accelerate  
lithium ions transport on the LiFePO<sub>4</sub> electrode

Jin-young Choi<sup>a</sup>, Hye-min Kim<sup>\*b</sup>, Yu-sung Kim<sup>a</sup>, In-sik Lee<sup>a</sup>, Byung-chul Cha<sup>b</sup> and Dae-wook Kim<sup>\*a</sup>

a) Advanced Manufacturing Process R&D Group, Ulsan Regional Division, Korea Institute of Industrial  
Technology (KITECH), 55, Jongga-ro, Jung-gu, Ulsan, 44313, Korea

b) Department of Materials Chemistry, Shinshu University, 4-17-1, Wakasato, Nagano, 3808553, Japan

\*Corresponding to Author: [dwkim@kitech.re.kr](mailto:dwkim@kitech.re.kr), [hmkim545@gmail.com](mailto:hmkim545@gmail.com)

Table. S1 Details of PIII process conditions.

| Sample | Plasma generation conditions |              |                                | Ion implantation conditions |                        |                |                       |
|--------|------------------------------|--------------|--------------------------------|-----------------------------|------------------------|----------------|-----------------------|
|        | Process pressure (torr)      | RF power (W) | N <sub>2</sub> gas flow (sccm) | Implantation energy (kV)    | Pulse width ( $\mu$ s) | Frequency (Hz) | Implantation time (s) |
| LFP-N5 | $2.0 \times 10^{-3}$         | 300          | 30                             | 5                           | 3.0                    | 500            | 60                    |
| LFP-N7 |                              |              |                                | 7                           |                        |                |                       |

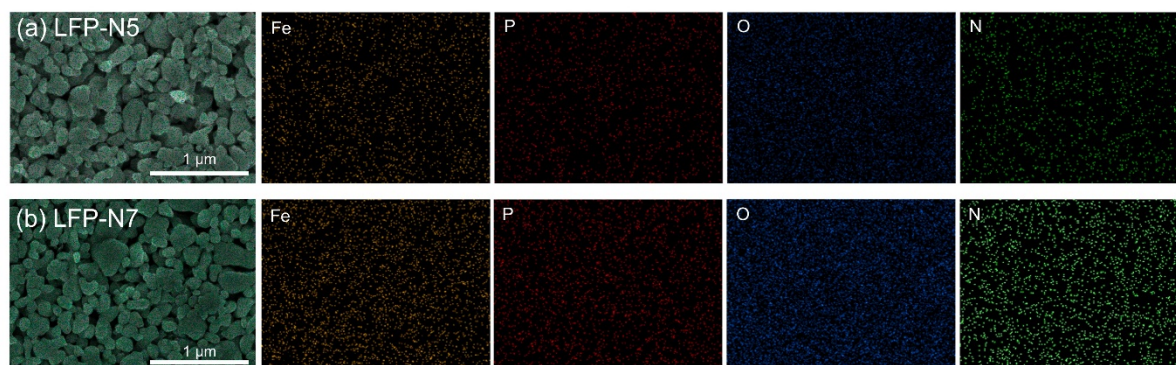

**Fig. S1** FE-SEM EDS mapping images for Fe, P, O and N of (a) LFP-N5 and (b) LFP-N7.

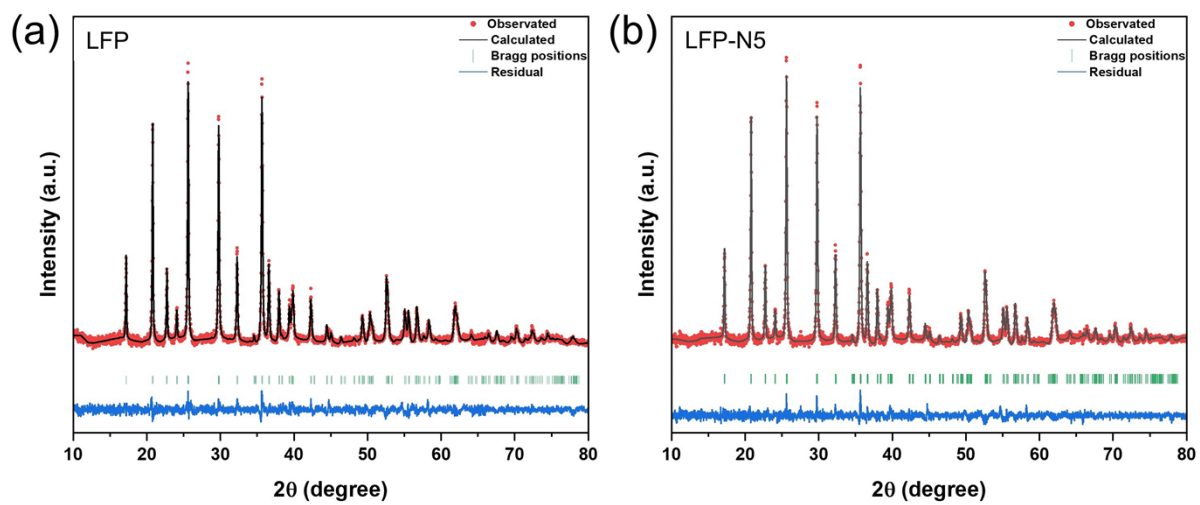

**Fig. S2** Rietveld refinement patterns of (a) LFP and (b) LFP-N5.

**Table S2.** Cell parameters of LFP, LFP-N5 and LFP-N7 obtained from Rietveld refinement of XRD.

|        | Cell parameter |        |        |                          |          |         |          |       |          |
|--------|----------------|--------|--------|--------------------------|----------|---------|----------|-------|----------|
|        | a              | b      | c      | volume (Å <sup>3</sup> ) | $\sigma$ | $\beta$ | $\gamma$ | $R_p$ | $R_{wp}$ |
| LFP    | 10.3176        | 6.0017 | 4.692  | 290.542                  | 90       | 90      | 90       | 5.38  | 8.37     |
| LFP-N5 | 10.3167        | 6.0009 | 4.6893 | 290.314                  | 90       | 90      | 90       | 5.32  | 8.11     |
| LFP-N7 | 10.3124        | 5.9973 | 4.6863 | 289.829                  | 90       | 90      | 90       | 5.87  | 8.52     |

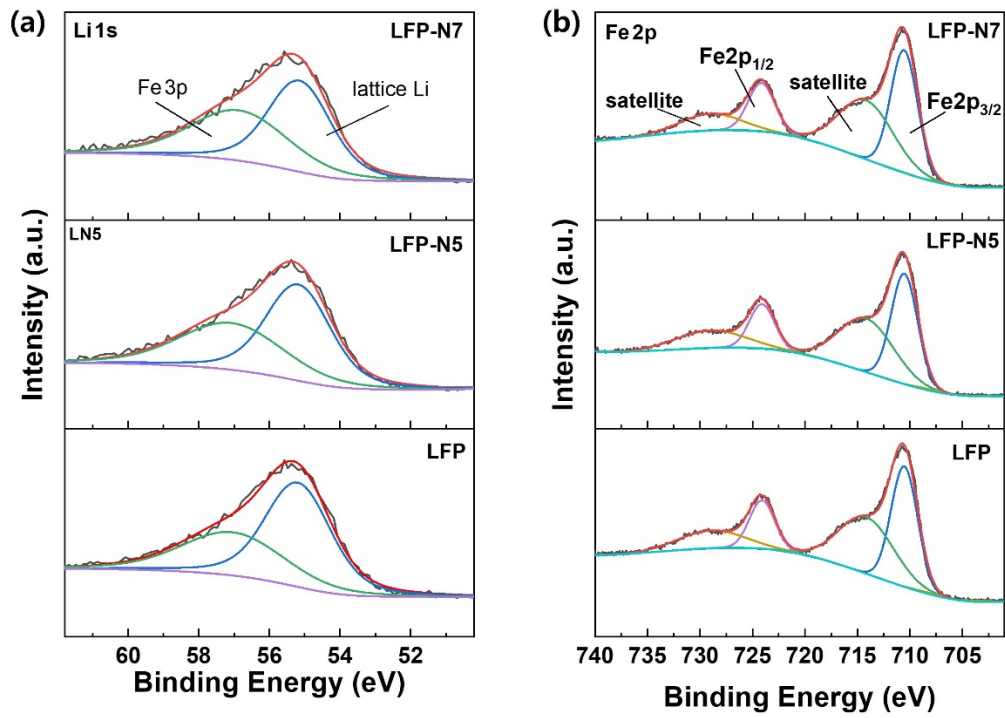

Fig. S3 Li 1s and Fe 2p XPS core-level spectra of LFP, LFP-N5 and LFP-N7.

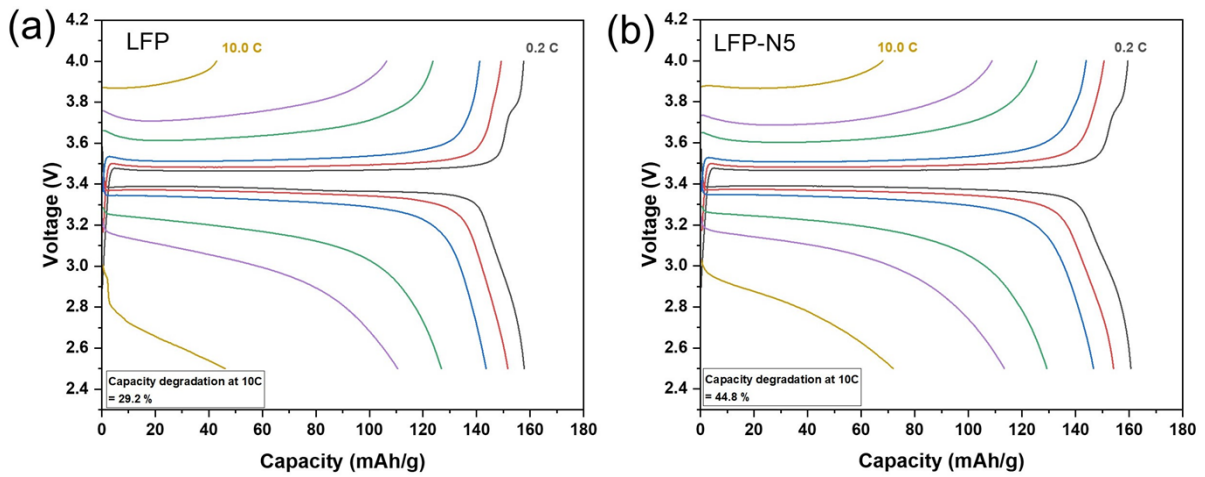

Fig. S4 Galvanostatic charge-discharge curves of LFP and LFP-N5 at varies C-rate.

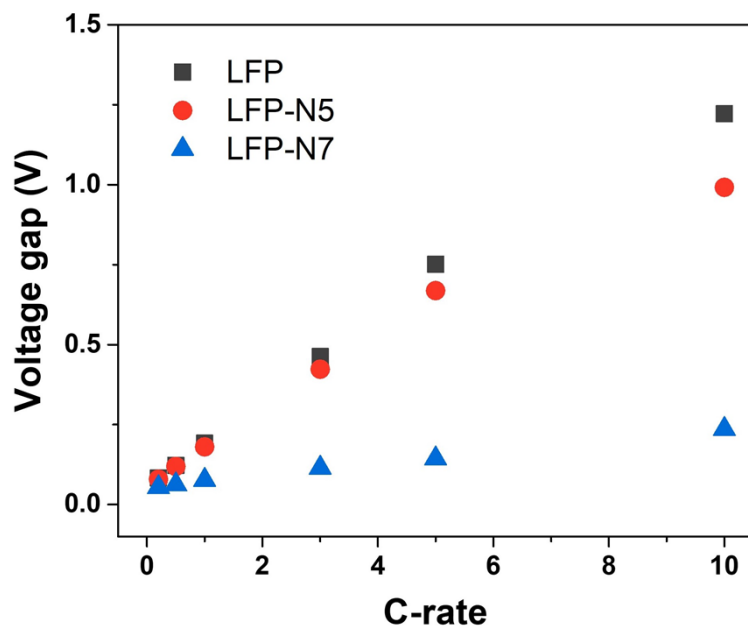

**Fig. S5** Relationship between the C-rate and voltage gap of the charge/discharge voltage plateau.

**Table S3.** EIS kinetic parameters of LFP, LFP-N5 and LFP-N7 electrode.

|        | $R_{sf}$ (ohm) | $R_{ct}$ (ohm) | $D_{Li}$ (cm <sup>2</sup> s <sup>-1</sup> ) |
|--------|----------------|----------------|---------------------------------------------|
| LFP    | 3.34           | 123.1          | $3.74 \times 10^{-14}$                      |
| LFP-N5 | 3.57           | 104.6          | $5.43 \times 10^{-14}$                      |
| LFP-N7 | 4.19           | 31.5           | $3.46 \times 10^{-13}$                      |

**Table S4** Rate performance of anion surface modification of LFP.

| Sample                                                    | Method                                                           | Performance                                                      | Ref.      |
|-----------------------------------------------------------|------------------------------------------------------------------|------------------------------------------------------------------|-----------|
| Cl-doped LiFePO <sub>4</sub> /C                           | solid-state reaction                                             | 105.3 mAh g <sup>-1</sup> @ 10C                                  | [1]       |
| LiFe(PO <sub>4</sub> ) <sub>0.9</sub> F <sub>0.3</sub> /C | co-precipitation reaction followed by high-temperature treatment | 110 mAhg g <sup>-1</sup> @ 10C                                   | [2]       |
| LiFePO <sub>3.938</sub> F <sub>0.062</sub> /C             | solid-state reaction                                             | 102.3 mAh g <sup>-1</sup> @ 10C                                  | [3]       |
| S-doped LiFePO <sub>4</sub>                               | solvothermal method                                              | 112.7 mAhg g <sup>-1</sup> @ 10C                                 | [4]       |
| F-doped LiFePO <sub>4</sub> @N/B/F-doped carbon           | hydrothermal method                                              | 116.4 mAh g <sup>-1</sup> @ 5 C<br>71.3 mAh g <sup>-1</sup> @15C | [5]       |
| Cl-doped LiFePO <sub>4</sub> /C                           | carbothermal reduction route                                     | 110 mAh g <sup>-1</sup> @ 10C                                    | [6]       |
| LiFePO <sub>x</sub> N <sub>y</sub> thin films             | Reactive magnetron sputter deposition                            | 100 mAh g <sup>-1</sup> @ 10C                                    | [7]       |
| S-doped LiFePO <sub>4</sub> @N/S-doped C                  | solvothermal method                                              | 121.26 mAh g <sup>-1</sup> @ 5 C                                 | [8]       |
| Li <sub>0.94</sub> FePO <sub>3.84</sub> N <sub>0.16</sub> | sol-gel approaches- thermal nitridation                          | ~60 mAh g <sup>-1</sup> @ 5 C                                    | [9]       |
| LFP-N7                                                    | plasma-immersion ion implantation (PIII)                         | 128 mAhg g <sup>-1</sup> @10C                                    | This work |

## References

1. H. Liu, S.-h. Luo, S.-x. Yan, Y.-f. Wang, Q. Wang, M.-q. Li and Y.-h. Zhang, *J. Electroanal. Chem.*, 2019, 850, 113434.
2. C. Gao, J. Zhou, G. Liu and L. Wang, *J. Alloys Compd.*, 2017, 727, 501-513.
3. Z. Yan, D. Huang, X. Fan, F. Zheng, Q. Pan, Z. Ma, H. Wang, Y. Huang and Q. Li, *Front. Mater.*, 2020, 6, 341.
4. K. Okada, I. Kimura and K. Machida, *RSC Adv.*, 2018, 8, 5848-5853.
5. Y. Meng, Y. Li, J. Xia, Q. Hu, X. Ke, G. Ren and F. Zhu, *Appl. Surf. Sci.*, 2019, 476, 761-768.
6. C. Sun, Y. Zhang, X. Zhang and Z. Zhou, *J. Power Sources*, 2010, 195, 3680-3683.
7. K.-F. Chiu, S.-H. Su, H.-J. Leu and Y. R. Jheng, *ECS Trans.*, 2016, 73, 27.
8. B. Zhang, S. Wang, L. Liu, J. Wang, W. Liu and J. Yang, *Nanotechnology*, 2022, 33, 405601.
9. S. F. Mayer, C. de la Calle, M. T. Fernández-Díaz, J. M. Amarilla and J. A. Alonso, *RSC Adv.*, 2022, 12, 3696-3707.
